# Supplementary material
Source: MDPI journal article supplement (https://www.mdpi.com/2071-1050/15/19/14583)
Supplement: s1 [file s1]

**Table S1.** Ice cream sensory evaluation instrument.

| Sample       | COLOR               |           |                               |           |                       |  | SMELL               |           |                               |           |                       |  | TASTE               |           |                               |           |                       |  | CONSISTENCY         |           |                               |           |                       |
|--------------|---------------------|-----------|-------------------------------|-----------|-----------------------|--|---------------------|-----------|-------------------------------|-----------|-----------------------|--|---------------------|-----------|-------------------------------|-----------|-----------------------|--|---------------------|-----------|-------------------------------|-----------|-----------------------|
|              | I like it very much | I like it | I neither like nor dislike it | I dislike | I strongly dislike it |  | I like it very much | I like it | I neither like nor dislike it | I dislike | I strongly dislike it |  | I like it very much | I like it | I neither like nor dislike it | I dislike | I strongly dislike it |  | I like it very much | I like it | I neither like nor dislike it | I dislike | I strongly dislike it |
| <b>P2706</b> |                     |           |                               |           |                       |  |                     |           |                               |           |                       |  |                     |           |                               |           |                       |  |                     |           |                               |           |                       |
| <b>G2807</b> |                     |           |                               |           |                       |  |                     |           |                               |           |                       |  |                     |           |                               |           |                       |  |                     |           |                               |           |                       |
| <b>E1121</b> |                     |           |                               |           |                       |  |                     |           |                               |           |                       |  |                     |           |                               |           |                       |  |                     |           |                               |           |                       |

In the present test you are asked to mark with an **X** your level of liking for each sample of each of the attributes listed in the table, remember to rinse your mouth between each sample. Each formulation has been identified with a unique alphanumeric code to prevent biases in the evaluation for the panel of trained judges. The assigned codes are as follows: F1 (G2807), F2 (P2706), and F3 (E1121).

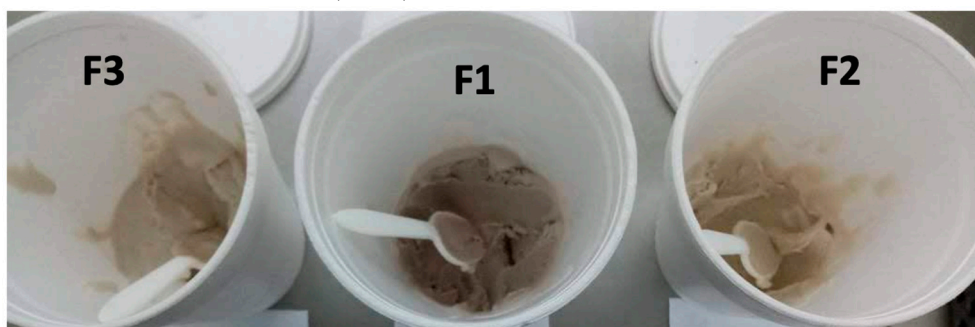

**Figure S1.** Ice cream base formulations.
